# Supplementary material for: Improved representation of soil moisture simulations through incorporation of cosmic-ray neutron count measurements in a large-scale hydrologic model
Source: Copernicus journal article supplement (doi:10.5194/egusphere-2023-1548), 2023-07-19
Supplement: Supplementary file 1 [file egusphere-2023-1548-supplement.pdf]

# Improved representation of Soil Moisture simulations through incorporation of cosmic-rays neutron counts measurements

Eshrat Fatima<sup>1</sup> and et al.<sup>2</sup>

<sup>1</sup>Dep. Computational Hydrosystems, UFZ - Helmholtz Centre for Environmental Research GmbH, Leipzig, Germany

<sup>2</sup>...

**Correspondence:** Eshrat Fatima (eshrat.fatima@ufz.de), Rohini Kumar (rohini.kumar@ufz.de), Martin Schrön (martin.schroen@ufz.de)

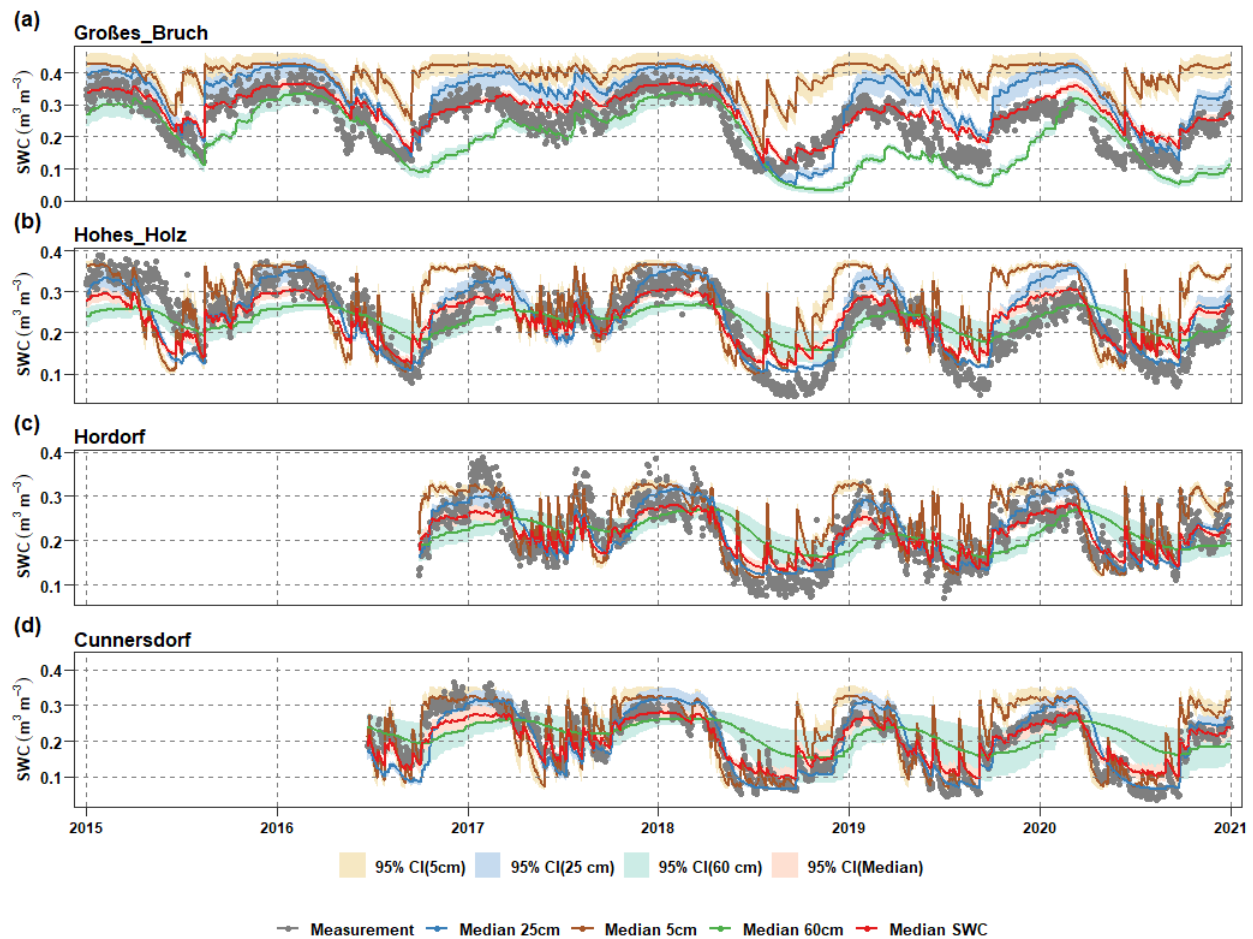

**Figure S1.** Soil Water content at different land cover sites measured by the sensor network (dotted grey), simulated mHM with different depths (0–5 cm) in brown, (0–25 cm) in blue, (0–60 cm) in green, and the median value is shown with red.

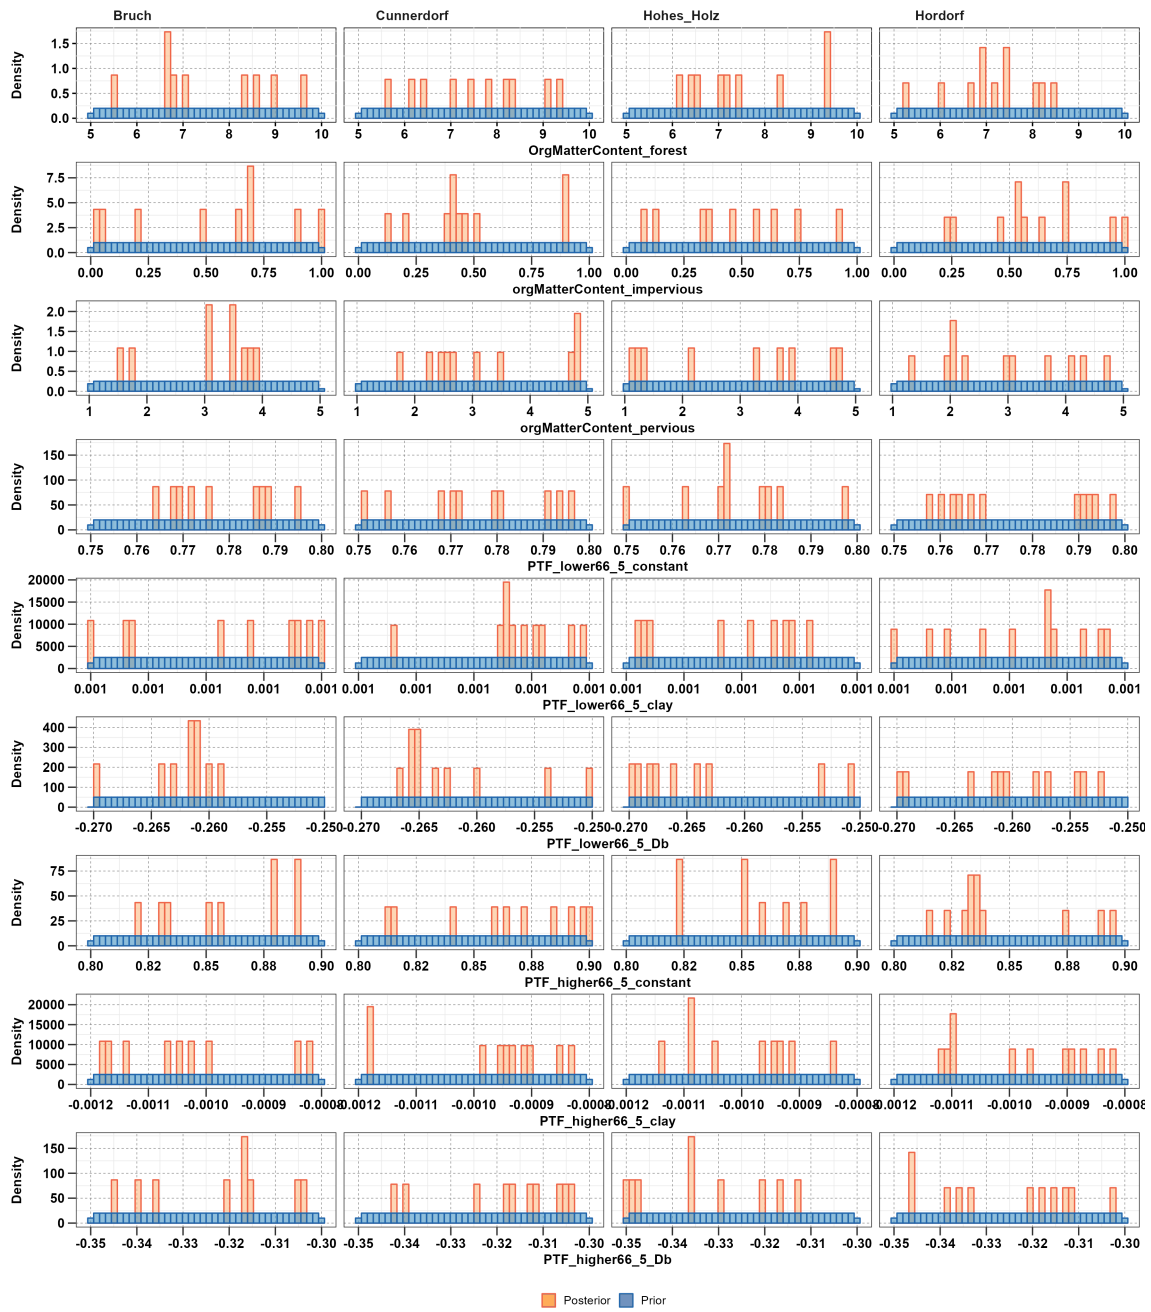

**Figure S2.** Soil Water content of nine parameter sets with LHS 100,000 in blue and LHS10 in Orange.

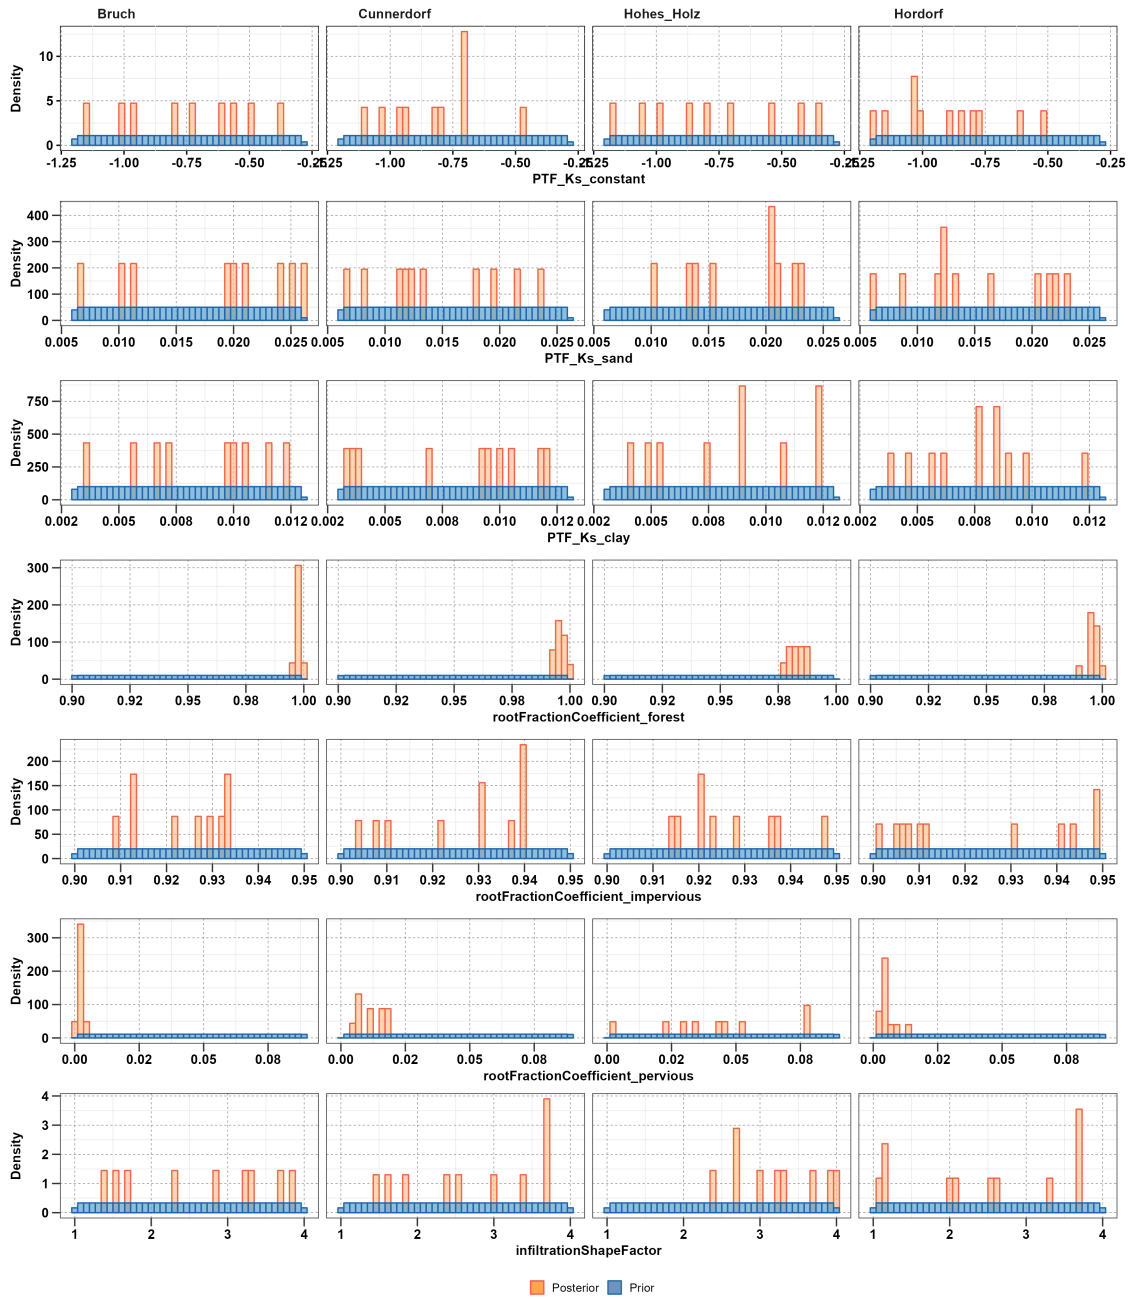

**Figure S3.** Soil Water content of seven parameter sets with LHS 100,000 in blue and LHS10 in Orange.

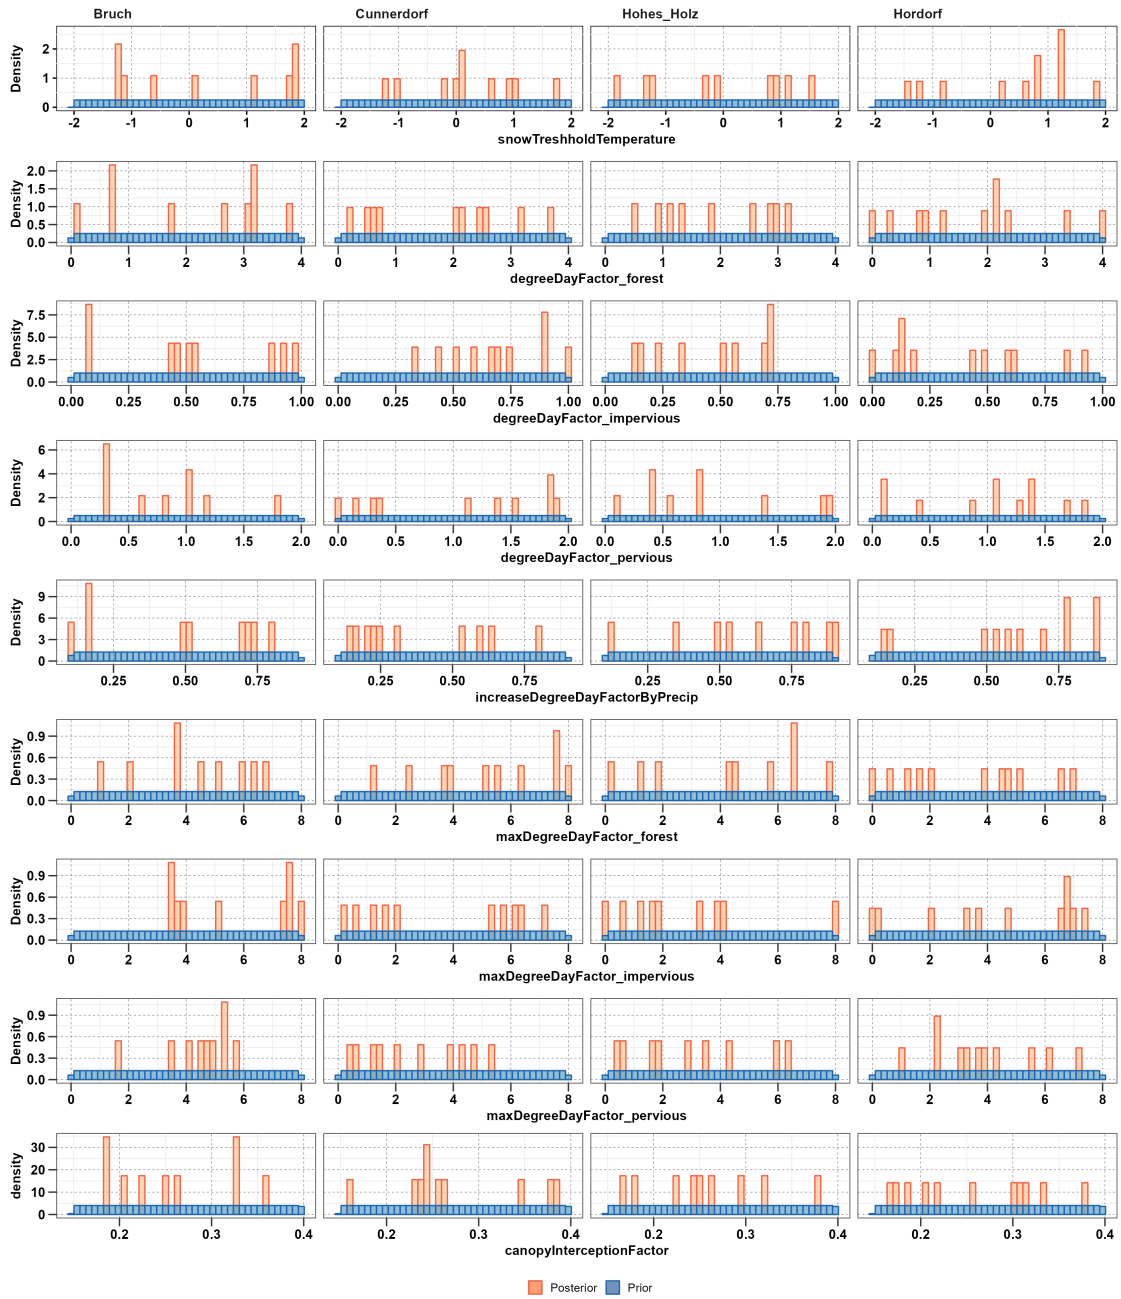

**Figure S4.** Snow parameter sets of nine parameter sets with LHS 100,000 in blue and LHS10 in Orange.

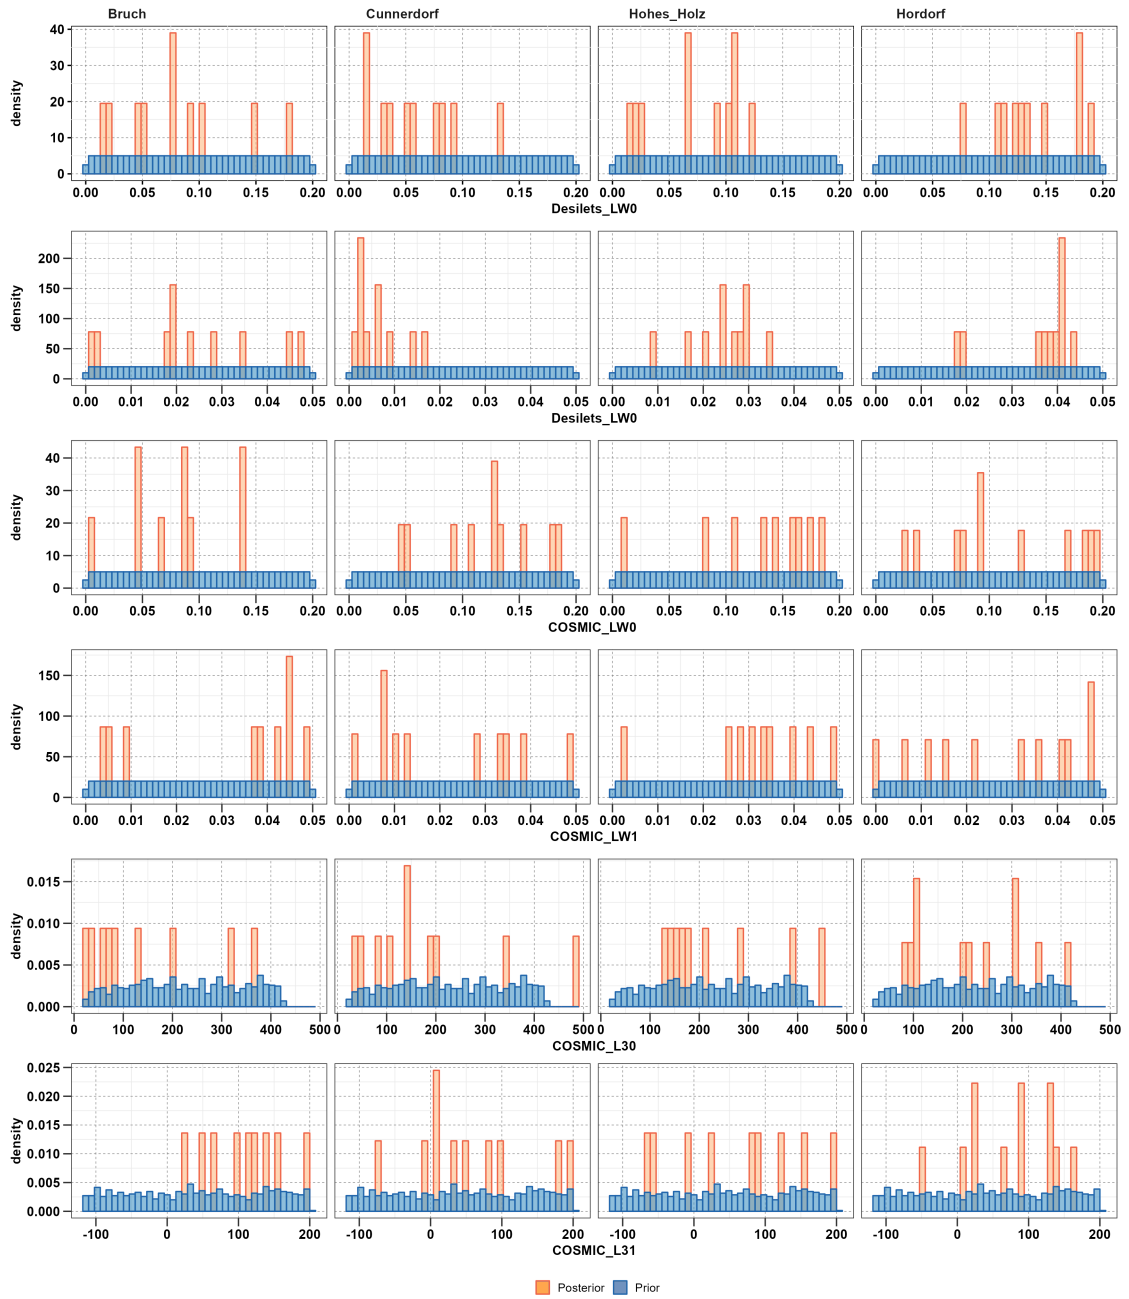

**Figure S5.** Neutron counts parameter sets of Six parameter sets with LHS 100,000 in blue and LHS10 in Orange.

**Table S1.** Description of the mHM Model Parameters ranges used in this Study.

| Parameter                       | Description                                                                                | Prior Range     |
|---------------------------------|--------------------------------------------------------------------------------------------|-----------------|
| Interception                    |                                                                                            |                 |
| canintfact                      | canopyInterceptionFactor                                                                   | 0.15-0.4        |
| Snow                            |                                                                                            |                 |
| tsnow                           | Threshold temperature for snow/rain (°C)                                                   | -2.0-2.0        |
| degreeDayFactor_forest          |                                                                                            | 0.0001-4.0      |
| degreeDayFactor_impervious      |                                                                                            | 0.00-1.0        |
| degreeDayFactor_pervious        |                                                                                            | 0.0-2.0         |
| increaseDegreeDayFactorByPrecip | degree-day factor per unit of precip ( $\text{mm day}^{-1} \text{ } ^\circ\text{C}^{-1}$ ) | 0.1-0.9         |
| maxDegreeDayFactor_forest       |                                                                                            | 0.0-8.0         |
| maxDegreeDayFactor_impervious   |                                                                                            | 0.0-8.0         |
| maxDegreeDayFactor_pervious     |                                                                                            | 0.0-8.0         |
| Soil moisture                   |                                                                                            |                 |
| orgmatforest                    | Organic matter content for forest                                                          | 5.0-10.0        |
| orgmatimper                     | Organic matter content for impervious zone                                                 | 0.0-1.0         |
| orgmatperv                      | Organic matter content for pervious zone                                                   | 1.0-5.0         |
| ptflowconst                     | ptf saturated water content: constant                                                      | 0.75-0.8        |
| ptflowclay                      | ptf saturated water content: coefficient clay content                                      | 0.0008-0.0012   |
| ptflowdb                        | ptf saturated water content: coefficient bulk density                                      | -0.27 - -0.25   |
| ptfhighconst                    | ptf saturated water content: constant                                                      | 0.8-0.9         |
| ptfhighclay                     | Coefficient for clay content in pedo-transfer function                                     | -0.35-0.30      |
| ptfhighdb                       | Coefficient for bulk density in pedo-transfer function for soils                           | -0.0012-0.00080 |
| ptfkconst                       | Constant in pedo-transfer function for hydraulic conductivity of soils                     | -1.200-0.285    |
| ptfkssand                       | ptf hydraulic conductivity: coefficient sand content                                       | 0.006-0.026     |
| ptfksclay                       | ptf hydraulic conductivity: coefficient clay content                                       | 0.003-0.013     |
| ptfksslp                        | Coefficient for slope in pedo-transfer function                                            | 60.96 - 60.96   |
| rotfcoffore                     | Root fraction for forest areas                                                             | 0.9- 0.999      |
| rotfcofimperv                   |                                                                                            | 0.9-0.095       |
| rotfcofpervi                    | Threshold for                                                                              | 0.001-0.090     |
| infshapef                       | Infiltration shape factor                                                                  | 1.0 - 4.0       |
| neutron counts                  |                                                                                            |                 |
| $N_{0(\text{Des})}$             | neutron intensity over dry soil under the same conditions (cph)                            | 600 - 1500      |
| $\text{Desliets}_{\text{lw}0}$  | lattice water content $gg^{-1}$                                                            | 0.0-0.2         |
| $\text{Desliets}_{\text{lw}1}$  | lattice water content $gg^{-1}$                                                            | 0.0-0.05        |
| $N_{0(\text{COSMIC})}$          | neutron intensity over dry soil under the same conditions (cph)                            | 100-400         |
| $\text{COSMIC}_{\text{L}30}$    | calculated using mean soil bulk density $\text{g cm}^{-2}$                                 | 20.0-500.0      |
| $\text{COSMIC}_{\text{L}31}$    | calculated using mean soil bulk density $\text{g cm}^{-2}$                                 | -120.0-200.0    |
| $\text{COSMIC}_{\text{lw}0}$    | lattice water content $gg^{-1}$                                                            | 0.0-0.20        |
| $\text{COSMIC}_{\text{lw}1}$    | lattice water content $gg^{-1}$                                                            | 0.0-0.05        |

**Table S2.** Description of the best parameter set values in mHM for each site and methods i.e., Grosses Bruch, Hohes Holz, Hordorf, and Cunnersdorf. To better assist the user we keep the model nomenclature name the same as that is there in the model code mHM.

| Parameters                      | Grosses Bruch |         |         | Hohes Holz |         |        | Hordorf |         |        | Cunnersdorf |         |         |
|---------------------------------|---------------|---------|---------|------------|---------|--------|---------|---------|--------|-------------|---------|---------|
| Methods:                        | Des,U         | Des,W   | COSMIC  | Des,U      | Des,W   | COSMIC | Des,U   | Des,W   | COSMIC | Des,U       | Des,W   | COSMIC  |
| Interception                    |               |         |         |            |         |        |         |         |        |             |         |         |
| caninfact                       | 0.217         | 0.297   | 0.226   | 0.370      | 0.20    | 0.242  | 0.323   | 0.312   | 0.184  | 0.395       | 0.334   | 0.377   |
| Snow                            |               |         |         |            |         |        |         |         |        |             |         |         |
| tsnow                           | -1.491        | 1.642   | 1.171   | -0.149     | 0.705   | -0.261 | -0.753  | 1.285   | -1.264 | 1.228       | 1.601   | -0.189  |
| degreeDayFactor_forest          | 3.896         | 2.676   | 3.215   | 1.915      | 2.17    | 2.524  | 0.824   | 3.87    | 0.286  | 1.1181      | 3.013   | 0.163   |
| degreeDayFactor_impervious      | 0.942         | 0.259   | 0.433   | 0.558      | 0.57    | 0.729  | 0.895   | 0.449   | 0.004  | 0.501       | 0.542   | 0.660   |
| degreeDayFactor_pervious        | 0.648         | 1.342   | 1.049   | 0.158      | 1.336   | 0.094  | 1.063   | 1.191   | 0.881  | 1.371       | 0.402   | 1.917   |
| increaseDegreeDayFactorByPrecip | 0.505         | 0.557   | 0.496   | 0.768      | 0.350   | 0.803  | 0.859   | 0.60    | 0.137  | 0.397       | 0.79    | 0.534   |
| maxDegreeDayFactor_forest       | 2.984         | 2.761   | 1.111   | 7.328      | 5.885   | 4.301  | 5.55    | 7.767   | 0.057  | 2.238       | 1.872   | 5.045   |
| maxDegreeDayFactor_impervious   | 1.681         | 5.367   | 5.187   | 0.803      | 5.371   | 3.992  | 4.68    | 4.483   | 0.250  | 2.674       | 0.459   | 1.234   |
| maxDegreeDayFactor_pervious     | 3.291         | 1.493   | 3.497   | 4.586      | 5.459   | 6.368  | 2.849   | 5.247   | 2.205  | 7.252       | 6.857   | 0.344   |
| Soil moisture                   |               |         |         |            |         |        |         |         |        |             |         |         |
| orgmatforest                    | 8.4456        | 6.51    | 5.551   | 9.324      | 7.362   | 8.365  | 5.718   | 9.733   | 6.9698 | 6.296       | 9.145   | 8.234   |
| orgmatimper                     | 0.124         | 0.615   | 0.690   | 0.180      | 0.8162  | 0.329  | 0.024   | 0.202   | 0.752  | 0.387       | 0.098   | 0.433   |
| orgmatperv                      | 2.307         | 1.219   | 3.769   | 1.314      | 2.643   | 4.696  | 4.778   | 4.466   | 2.227  | 4.8759      | 4.328   | 3.059   |
| ptflowconst                     | 0.794         | 0.7505  | 0.768   | 0.752      | 0.793   | 0.783  | 0.765   | 0.774   | 0.796  | 0.766       | 0.774   | 0.755   |
| ptflowclay                      | 0.00099       | 0.001   | 0.00087 | 0.001      | 0.0009  | 0.001  | 0.0009  | 0.0009  | 0.0008 | 0.0009      | 0.0008  | 0.0008  |
| ptflowdb                        | -0.263        | -0.265  | -0.261  | -0.266     | -0.262  | -0.267 | -0.267  | -0.258  | -0.269 | -0.262      | -0.265  | -0.265  |
| ptfhighconst                    | 0.893         | 0.891   | 0.8792  | 0.836      | 0.827   | 0.851  | 0.8363  | 0.889   | 0.835  | 0.855       | 0.8165  | 0.839   |
| ptfhighclay                     | -0.0011       | -0.0008 | -0.0010 | -0.0009    | -0.0009 | -0.001 | -0.0008 | -0.001  | -0.001 | -0.0009     | -0.0011 | -0.0011 |
| ptfhighdb                       | -0.335        | -0.349  | -0.304  | -0.345     | -0.322  | -0.330 | -0.308  | -0.308  | -0.311 | -0.328      | -0.345  | -0.305  |
| ptfksconst                      | -1.084        | -0.715  | -1.158  | -0.549     | -0.971  | -0.345 | -0.362  | -0.978  | -1.015 | -1.045      | -0.842  | -0.792  |
| ptfkssand                       | 0.015         | 0.022   | 0.0194  | 0.014      | 0.021   | 0.023  | 0.009   | 0.0219  | 0.021  | 0.025       | 0.0195  | 0.0214  |
| ptfksclay                       | 0.011         | 0.011   | 0.007   | 0.0067     | 0.008   | 0.012  | 0.009   | 0.0096  | 0.007  | 0.006       | 0.003   | 0.0093  |
| ptfksslp                        | 60.96         | 60.96   | 60.96   | 60.96      | 60.96   | 60.96  | 60.96   | 60.96   | 60.96  | 60.96       | 60.96   | 60.96   |
| rotfcoffore                     | 0.995         | 0.997   | 0.998   | 0.9546     | 0.937   | 0.985  | 0.968   | 0.934   | 0.99   | 0.989       | 0.939   | 0.998   |
| rotfcofimperv                   | 0.918         | 0.904   | 0.922   | 0.939      | 0.934   | 0.920  | 0.922   | 0.936   | 0.910  | 0.932       | 0.939   | 0.939   |
| rotfcofpervi                    | 0.0072        | 0.0039  | 0.0054  | 0.011      | 0.087   | 0.051  | 0.027   | 0.015   | 0.004  | 0.039       | 0.939   | 0.017   |
| infshapef                       | 2.898         | 3.610   | 3.838   | 1.383      | 2.811   | 2.381  | 3.620   | 2.182   | 2.598  | 2.725       | 3.005   | 1.488   |
| neutron counts                  |               |         |         |            |         |        |         |         |        |             |         |         |
| N <sub>0(Des)</sub>             | 888.01        | 879.63  |         | 854.76     | 909.08  |        | 1121.9  | 1169.53 |        | 1270.64     | 1234.69 |         |
| Desliets <sub>lw0</sub>         | 0.0916        | 0.174   |         | 0.026      | 0.105   |        | 0.128   | 0.151   |        | 0.0048      | 0.0843  |         |
| Desliets <sub>lw1</sub>         | 0.0184        | 0.00197 |         | 8.675      | 0.009   |        | 0.0061  | 0.0033  |        | 0.0033      | 0.0059  |         |
| N <sub>0(COSMIC)</sub>          |               |         | 245.11  |            |         | 233.89 |         |         | 303    |             |         | 317.24  |
| COSMIC <sub>L30</sub>           |               |         | 130.79  |            |         | 285.37 |         |         | 88.70  |             |         | 34.83   |
| COSMIC <sub>L31</sub>           |               |         | 192.14  |            |         | 90.72  |         |         | 128.01 |             |         | 50.12   |
| COSMIC <sub>lw0</sub>           |               |         | 0.137   |            |         | 0.186  |         |         | 0.036  |             |         | 0.151   |
| COSMIC <sub>lw1</sub>           |               |         | 0.0086  |            |         | 0.030  |         |         | 0.047  |             |         | 0.033   |

**Table S3.** Site-specific values of lattice water ( $\text{cm}^3\text{cm}^{-3}$ ), clay content (%), mean bulk density ( $\text{gcm}^{-3}$ ), and  $L_3$  ( $\text{g cm}^{-2}$ ) is from the COSMIC method, mean and standard deviation obtained by the best 10 ensemble members from the three methods i.e.,  $N_{\text{Des,U}}$ ,  $N_{\text{Des,W}}$  and  $N_{\text{Des,COSMIC}}$  of four different sites.

| Sites                                         | Symbol               | Grosses Bruch |        | Hohes Holz |       | Hordorf |       | Cunnersdorf |        |
|-----------------------------------------------|----------------------|---------------|--------|------------|-------|---------|-------|-------------|--------|
|                                               |                      | Mean          | SD     | Mean       | SD    | Mean    | SD    | Mean        | SD     |
| Lattice Water ( $\text{cm}^3\text{cm}^{-3}$ ) | $\theta_{\text{lw}}$ | 0.04          | 0.02   | 0.04       | 0.02  | 0.03    | 0.02  | 0.02        | 0.02   |
| Clay (%)                                      | C                    | 2.5           | -      | 14.0       | -     | 21.0    | -     | 14.5        | -      |
| Mean Bulk density ( $\text{gcm}^{-3}$ )       | $\rho$               | 1.30          | 0.04   | 1.03       | 0.04  | 1.14    | 0.09  | 1.25        | 0.04   |
| $L_3$ ( $\text{g cm}^{-2}$ )                  | $L_3$                | 289.02        | 246.29 | 232.46     | 154.0 | 295.48  | 177.8 | 123.0       | 168.32 |
